# Supplementary material
Source: PubMed Central journal article supplement (PMC3783230)
Supplement: supp_mct165_mct165supp_fig4.pdf [file supp_mct165_mct165supp_fig4.pdf]

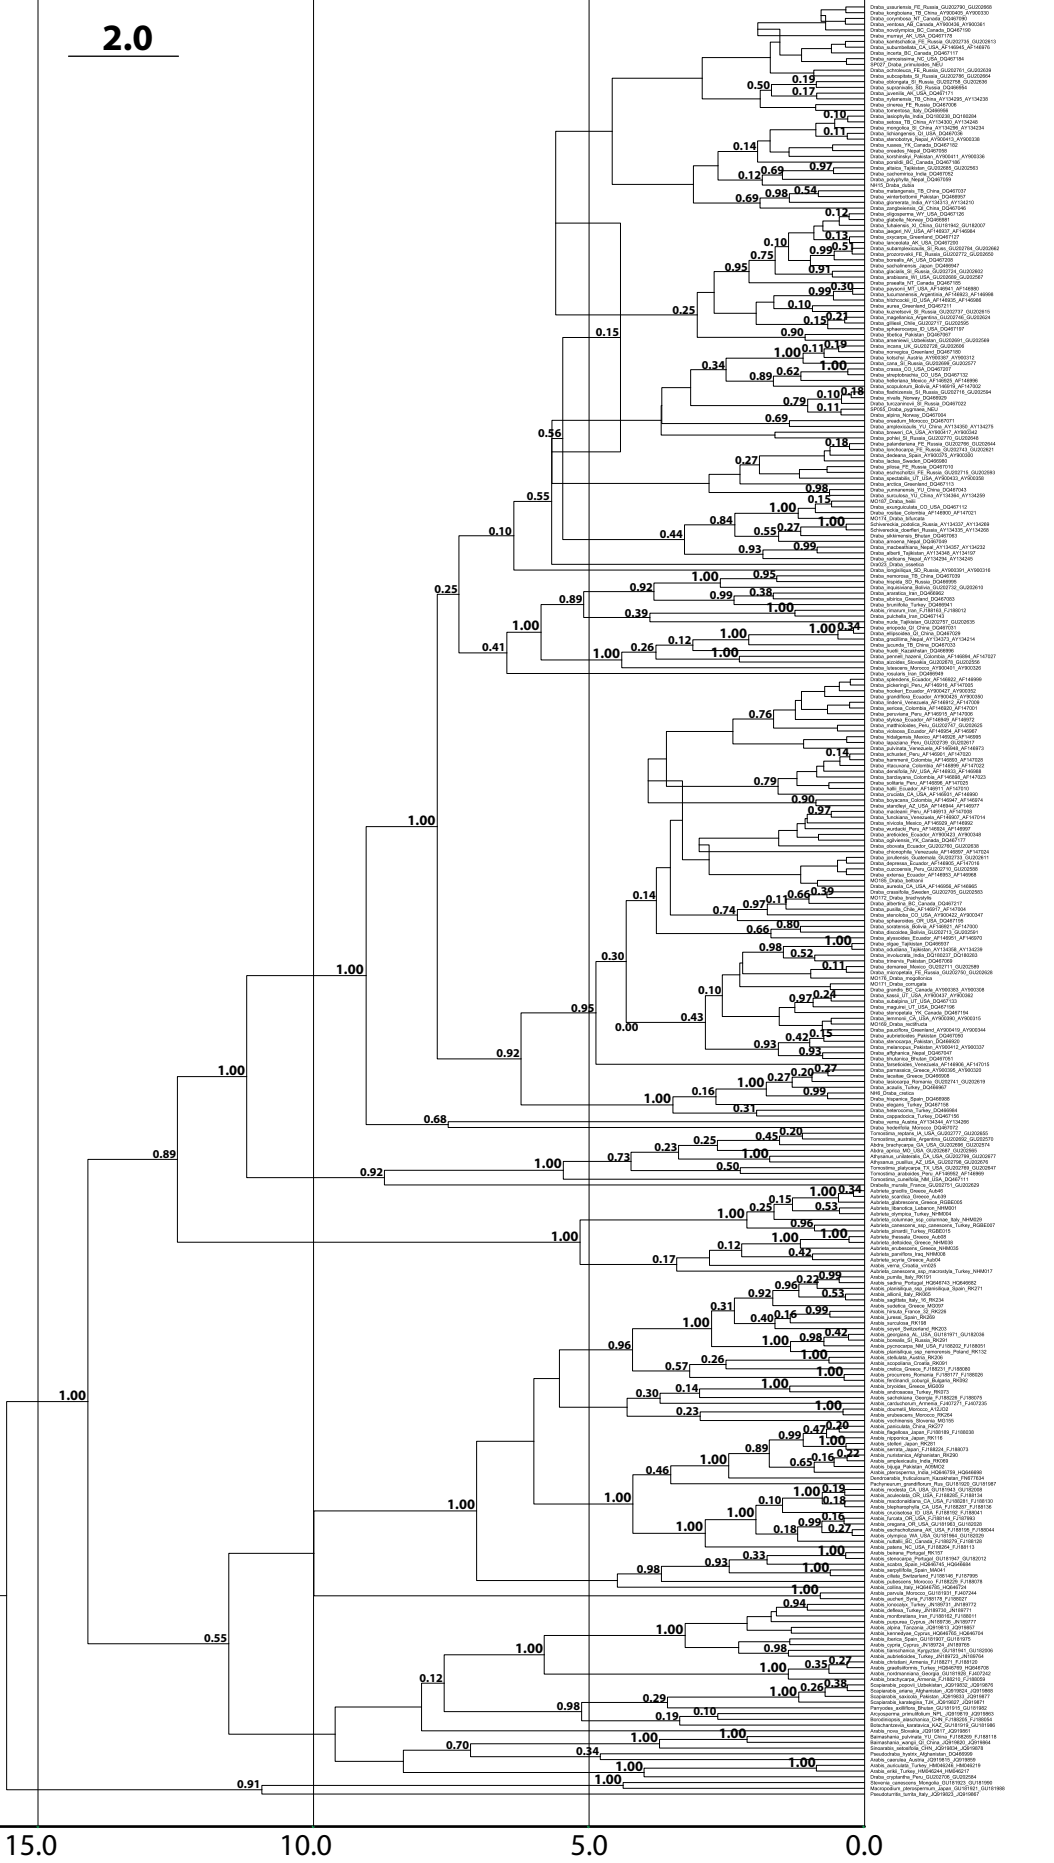

Figure S4: MCC tree from the divergence time estimation in BEAST based on the trnL-F data set with posterior probability values for all nodes with more than 5 % support.

Core Draba

Tomostima clade

Aubrieta clade

main Arabis clade

Arabis aucheri clade

Arabis alpina clade

Arabis nordmanniana clade

Scapiarabis clade

Arabis auriculata clade (outgroup)

15.0 10.0 5.0 0.0
