# Supplementary material
Source: PubMed Central journal article supplement (PMC3783230)
Supplement: supp_mct165_mct165supp_fig5.pdf [file supp_mct165_mct165supp_fig5.pdf]

Figure S5: MCC tree from the divergence time estimation in BEAST based on the ITS data set with posterior probability values for all nodes with more than 5 % support.

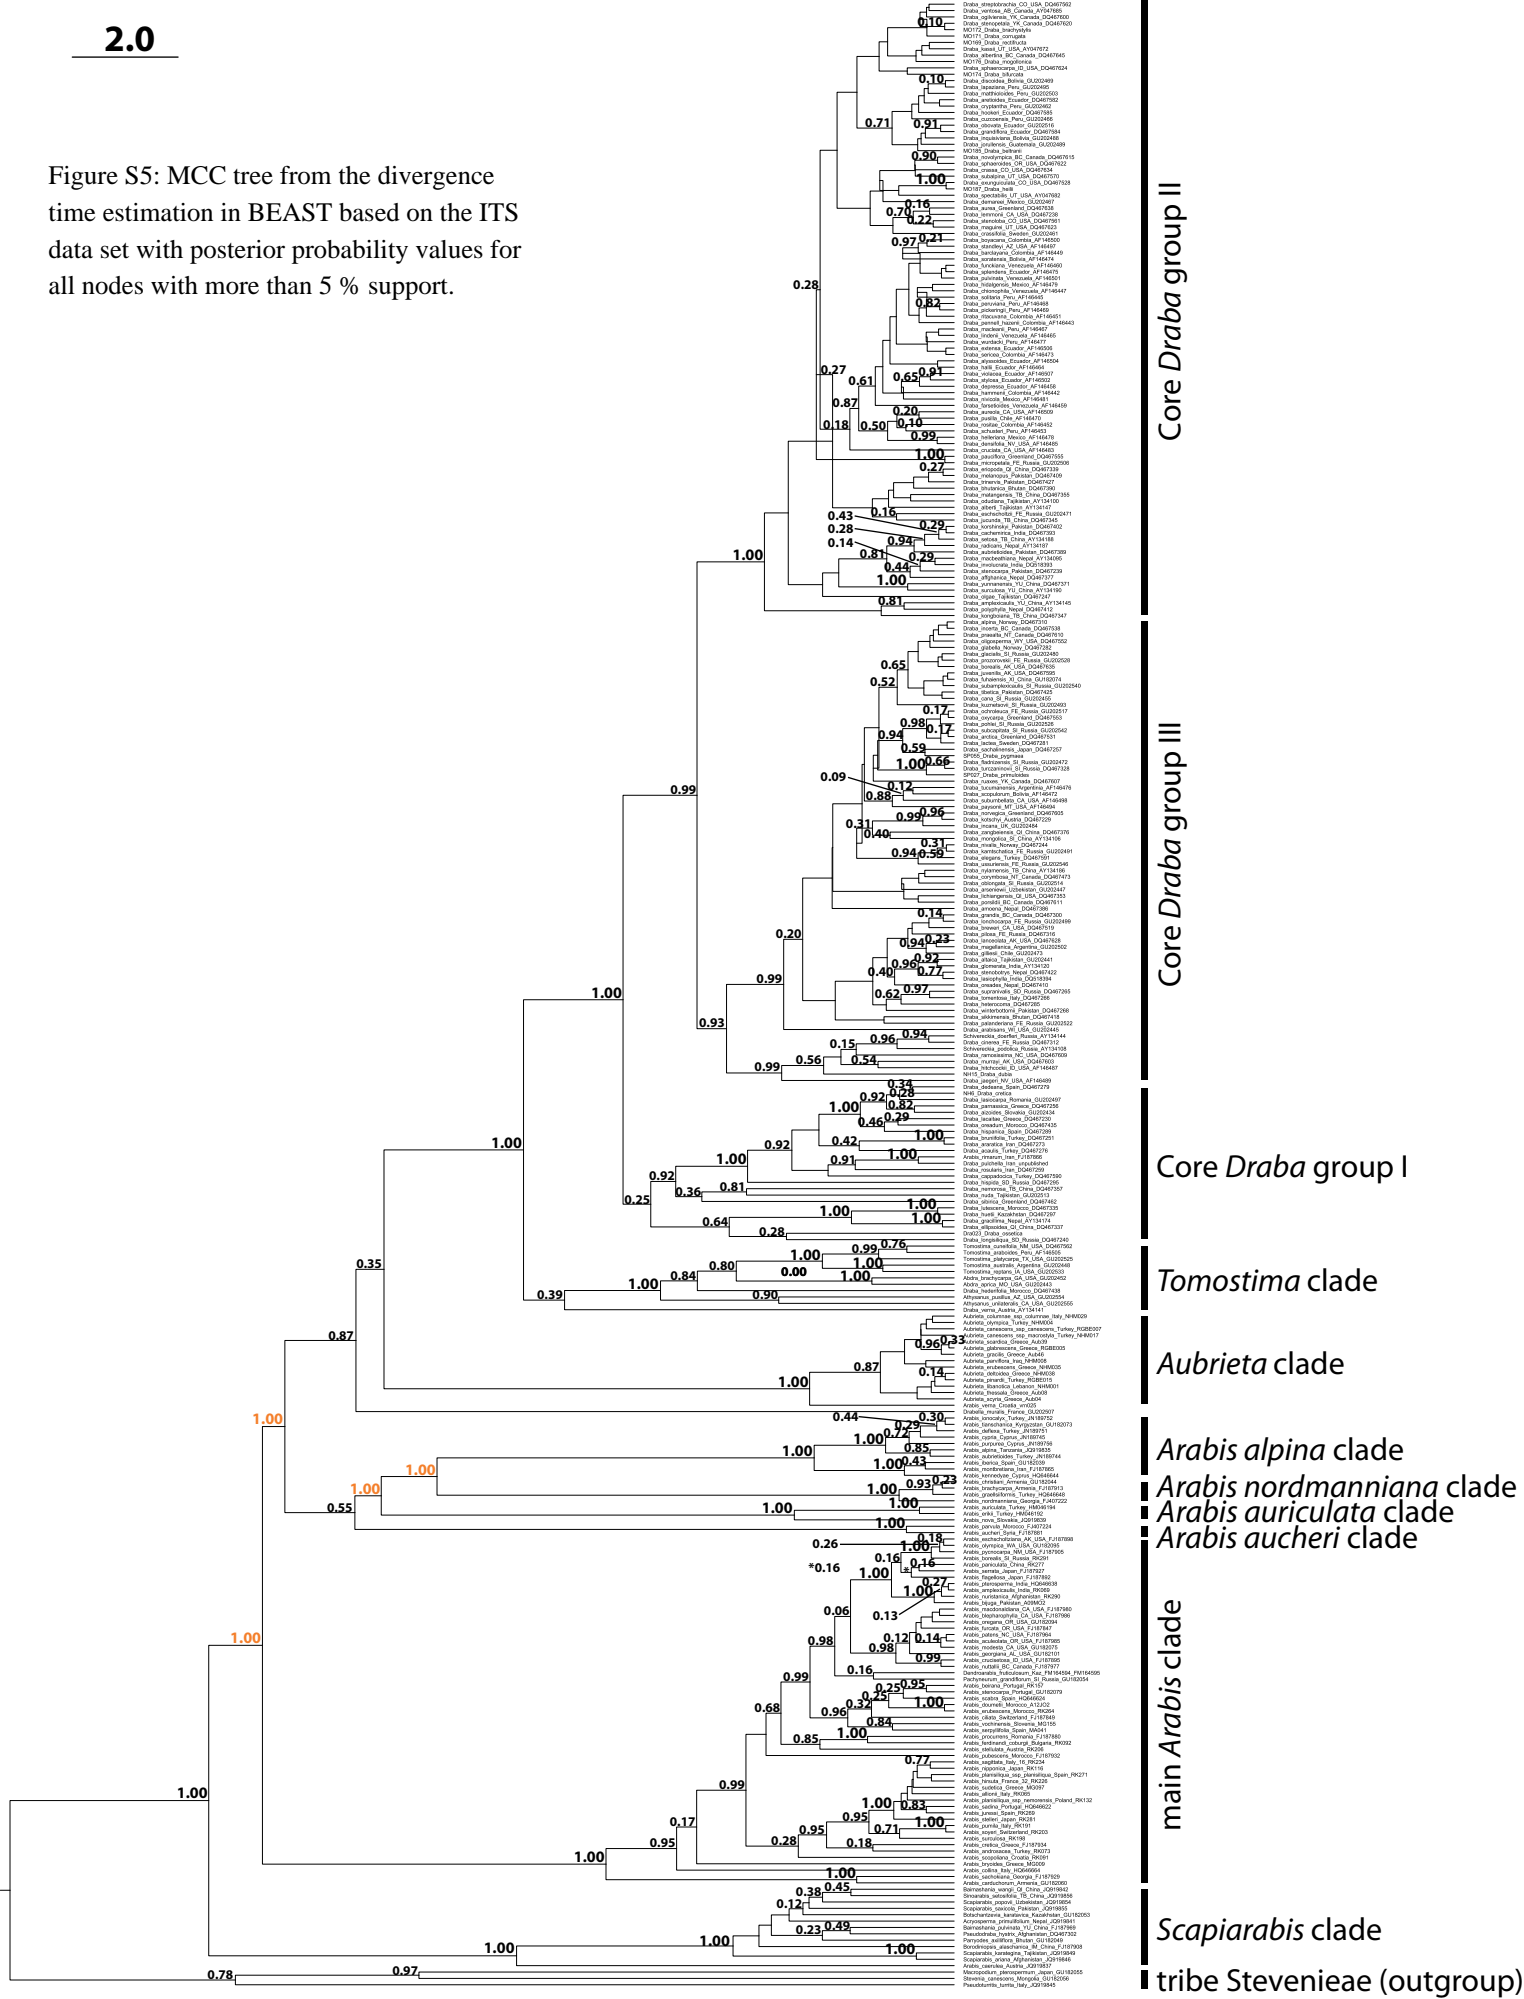

Core Draba group II

Core Draba group III

Core Draba group I

Tomostima clade

Aubrieta clade

Arabis alpina clade

Arabis nordmanniana clade

Arabis auriculata clade

Arabis aucheri clade

main Arabis clade

Scapiarabis clade

tribe Stevenieae (outgroup)
