# Supplementary material
Source: PubMed Central journal article supplement (PMC3783230)
Supplement: supp_mct165_mct165supp_table2.pdf [file supp_mct165_mct165supp_table2.pdf]

**Supplementary Data Table S2: Floras, publications and online databases used for the compilation of distribution ranges, life cycles, elevations/habitats and ploidy levels of the Arabideae taxa**

- Al-Shehbaz IA. 2007.** *Arabis elgonensis* (Brassicaceae), a new species from Mount Elgon, Uganda. *Harvard Papers in Botany* **12**: 387–388.
- Al-Shehbaz IA. 2009.** *Arabis*. In: Flora of North America Editorial Committee, ed. *Flora of North America*, vol. 7. New York, NY: Oxford University Press, 257–266.
- Ball PW, Heywood VH, Akeroyd JR. 1993.** Cruciferae. In: Tutin TG, Burges NA, Chater AO, et al., eds. *Flora Europaea*, vol. 1, 2nd edn. Cambridge: Cambridge University Press, 313–417.
- Boissier E. 1867.** *Flora orientalis*, vol. 1. Basel – Genf: [publisher unknown], 165–178.
- Busch NA. 1939.** Cruciferae. In: Komarov VL, ed. *Flora of the U.S.S.R.*, vol. 8. St. Petersburg – Moscow: Izdatelstvo Akademii Nauk SSSR, 13–453.
- Cullen J. 1965.** *Arabis*. In: Davis PH, ed. *Flora of Turkey*, vol. 1. Edinburgh: Edinburgh University Press, 422–429.
- Cullen J. 1965.** *Aubrieta*. In: Davis PH, ed. *Flora of Turkey*, vol. 1. Edinburgh: Edinburgh University Press, 444–447.
- Duman H. 2001.** A new species of *Arabis* L. (Brassicaceae) from South Anatolia. *Botanical Journal of the Linnean Society* **137**: 87–90.
- Fischer MA, Adler W, Oswald K. 2008.** *Exkursionsflora für Österreich, Liechtenstein und Südtirol*, 3rd ed. Linz: Land Oberösterreich, Biologiezentrum der OÖ Landesmuseen, 640–643.
- Grierson AJC, Long DG. 1984.** *Flora of Bhutan*, vol. 1, part 2. Edinburgh: Edinburgh Royal Botanical Garden, 434–435.
- Gustavsson LA. 1986.** *Aubrieta*. In: Strid A, ed. *Mountain Flora of Greece*, vol. 1. Cambridge: Cambridge University Press, 268–274.
- Hedge J. 1968.** *Arabis*. In: Rechinger KH, ed. *Flora Iranica*, vol. 60: Cruciferae. Graz: Akademische Druck und Verlagsanstalt, 201–210.
- Jafri SMH. 1973.** Brassicaceae. In: Nasir E, Ali SI, eds. *Flora of West Pakistan*, vol. 55,. Karachi: University of Karachi, 1–308.
- Jalas J, Souminen J [eds.]. 1994.** *Atlas Florae europaeae*, vol. 10. Helsinki: The Committee for mapping the Flora of Europe & Societas Biologica Fennica Vanamo, 187–211.

- Kitamura S [ed.]. 1960.** *Flora of Afghanistan*. Kyoto: The Committee of the Kyoto University Scientific Expedition to the Karakorum and Hindukush, 141–142.
- Köie M, Rechinger KH. 1958.** *Symbolae afghanicae*, vol. 4. Copenhagen: Det Kongelige Danske Videnskabernes Selskab 10 (3), 36–37.
- Maire R. 1967.** *Flore de l'Afrique du Nord*, vol. 13. Paris: Paul Lechevalier, 303–338.
- Meikle RD. 1977.** *Flora of Cyprus*, vol. 1. Kew Royal Botanical Gardens: The Bentham-Moxon Trust, 148–151.
- Munz PA, Keck DD. 1959.** *A California Flora*. Los Angeles, CA: University of Berkeley Press, 256–265.
- Mutlu B. 2004.** A new species of *Arabis* (Brassicaceae) from inner Anatolia. *Botanical Journal of the Linnean Society* **145**: 251–256.
- Mutlu B, Dönmez AA. 2003.** *Arabis mollis* Steven (Brassicaceae): A new record for Turkey. *Turkish Journal of Botany* **2**: 235–238.
- Mutlu B, Erik S. 2012.** Lectotypification, description, and distribution of *Arabis deflexa* (Cruciferae). *Turkish Journal of Botany* **36**: 21–26.
- Ohwi J. 1965.** Cruciferae. In: Meyer FG, Walker EH, eds. *Flora of Japan*. F. G. Meyer, and E. H. Walker [ed.], Washington, D.C.: Smithsonian Institution, 479–493.
- Ovchinnikov PN [ed.]. 1978.** *Flora Tadjikskoi SSR*, vol. 5. St. Petersburg: Izdatelstvo 'Nauka', 79–85.
- Parolly G, Hein P. 2000.** *Arabis lycia* (Cruciferae), a new chasmophyte from the Taurus Mts, Turkey, and notes on related species. *Willdenowia* **3**: 293–304.
- Pavlov NV [ed.]. 1961.** *Flora Kazakhstana*, vol. 4. Almaty: Izdatelstvo Akademii Nauk Kazakhskoi SSR, 219–225.
- Phitos D. 2002.** Aubrieta. In: Strid A, Tan K, eds. *Flora Hellenica*, vol. 2. Ruggell: A.R.G. Gantner Verlag K.G., 192–195.
- Rollins RC. 1993.** *The Cruciferae of Continental North America*. Stanford, CA: Stanford University Press, 115–210.
- Rybinskaja EV. 1994.** Pachyneurum. In: Malyshev LI, Peshkova GA, eds. *Flora Sibiri*, vol. 7: Berberidaceae-Grossulariaceae., Novosibirsk: VO 'Nauka', Sibirskaja Izdatelskaja Firma, 94–95.
- Schultze-Motel W. 1986.** Berberidaceae, Lauraceae, Papaveraceae, Cruciferae, Capparidaceae and Resedaceae. In: Conert HJ, Hamann U, Schultze-Motel W, Wagenitz G, eds. *Gustav Hegi - Flora von Mitteleuropa*, 3rd ed., vol. 4, part 1. Berlin – Hamburg, Verlag Paul Parey, 240–264.

- Silveira P, Paiva J. 2001.** A new endemic species of *Arabis* L. (Cruciferae) from central Portugal. *Botanical Journal of the Linnean Society* **135**: 299–303.
- Strid A, Titz W. 1986.** *Arabis*. In: Strid A., ed. *Mountain Flora of Greece*, vol. 1. Cambridge: Cambridge University Press, 261–268.
- Taiyan Z, Lianli L, Guang Y, Al-Shehbaz IA. 2001.** Brassicaceae (Cruciferae). In: Zhengyi W, Raven PH, eds. *Flora of China*, vol. 8. Beijing: Science Press, and St. Louis, MO: Missouri Botanical Garden Press, 1–119.
- Talavera S. 1993.** *Arabis*. In: Castroviejo S, Aedo C, Gomez Campo C, et al., eds. *Flora Iberica*, vol. 4. Madrid: Real Jardín Botánico, C.S.I.C., 135–163.
- Titz W. 1969.** Zur Cytotaxonomie von *Arabis hirsuta* agg. (Cruciferae). II. Morphologische Analyse österreichischer Populationen und die Abgrenzung der Sippen. *Österreichische Botanische Zeitschrift* **117**: 21–53.
- Titz W. 1976.** Cytosystematic study on the Iberian taxa of the *Arabis hirsuta* group. *Feddes Repertorium* **87**: 493–502.
- Titz W. 1979.** Untersuchungen zur systematischen Stellung von *Arabis nepetifolia* Boiss. (Cruciferae). *Linzer biologische Beiträge* **10**: 327–331.
- Titz W. 1979.** Über die Abtrennung des karpatisch-ostsubmediterranen Endemiten *Arabis hornungiana* von *A. hirsuta* s. str. (Brassicaceae). *Linzer biologische Beiträge* **11**: 219–226.
- Townsend CC, Guest E. 1980.** *Flora of Iraq*, vol. 4, part 2. Baghdad: Ministry of Agriculture and Agrarian Reform, 1003–1007.
- Warwick SI, Al-Shehbaz IA. 2006.** Brassicaceae: Chromosome number index and database on CD-Rom. *Plant Systematics and Evolution* **259**: 237–248.
- Warwick SI, Francis A, Al-Shehbaz IA. 2006.** Brassicaceae: Species Checklist and database on CD-Rom. *Plant Systematics and Evolution* **259**: 249–258.
- Zangheri P. 1976.** *Flora italica*, vol. 1. Padova: CEDAM, 197–200.
