# Supplementary material
Source: PubMed Central journal article supplement (PMC3783230)
Supplement: supp_mct165_mct165supp_table6.pdf [file supp_mct165_mct165supp_table6.pdf]

**Supplementary Data Table S6.** Probability values for all 20 main nodes of the ancestral character state reconstructions using BBM in RASP (life cycle strategy on top, habitat elevation below). For all nodes values with probabilities over 50 % are indicated in bold.

| <b>life cycle strategy</b> | annual (A)   | perennial (B) | equivocal (AB) |
|----------------------------|--------------|---------------|----------------|
| node 1                     | 0.13         | <b>87.46</b>  | 12.41          |
| node 2                     | 1.04         | <b>84.43</b>  | 14.53          |
| node 3                     | <b>79.82</b> | 4.69          | 15.49          |
| node 4                     | 0.03         | <b>97.72</b>  | 2.26           |
| node 5                     | 0.00         | <b>99.92</b>  | 0.08           |
| node 6                     | 0.00         | <b>99.91</b>  | 0.09           |
| node 7                     | 0.00         | <b>99.91</b>  | 0.09           |
| node 8                     | <b>96.98</b> | 0.20          | 2.82           |
| node 9                     | <b>95.45</b> | 0.38          | 4.17           |
| node 10                    | 44.35        | 24.19         | 31.46          |
| node 11                    | <b>53.66</b> | 21.84         | 24.50          |
| node 12                    | <b>96.04</b> | 0.28          | 3.68           |
| node 13                    | <b>87.45</b> | 1.75          | 10.81          |
| node 14                    | 2.72         | <b>82.58</b>  | 14.70          |
| node 15                    | <b>86.62</b> | 1.97          | 11.41          |
| node 16                    | 4.74         | <b>76.54</b>  | 18.72          |
| node 17                    | 0.64         | <b>92.37</b>  | 6.99           |
| node 18                    | 0.00         | <b>99.74</b>  | 0.26           |
| node 19                    | 0.00         | <b>99.75</b>  | 0.25           |
| node 20                    | 0.00         | <b>99.75</b>  | 0.25           |

  

| <b>habitat elevation</b> | lowland (A)  | high montane/<br>alpine (B) | equivocal (AB) |
|--------------------------|--------------|-----------------------------|----------------|
| node 1                   | 1.73         | 47.65                       | <b>50.63</b>   |
| node 2                   | 6.97         | 45.07                       | 47.97          |
| node 3                   | <b>87.67</b> | 1.56                        | 10.77          |
| node 4                   | 0.78         | <b>66.48</b>                | 32.74          |
| node 5                   | 0.00         | <b>99.16</b>                | 0.84           |
| node 6                   | 0.31         | <b>93.73</b>                | 5.95           |
| node 7                   | 3.59         | <b>76.19</b>                | 20.23          |
| node 8                   | <b>97.04</b> | 0.15                        | 2.81           |
| node 9                   | <b>92.50</b> | 0.71                        | 6.79           |
| node 10                  | 6.10         | <b>70.99</b>                | 22.91          |
| node 11                  | 1.21         | <b>87.06</b>                | 11.73          |
| node 12                  | <b>98.43</b> | 0.06                        | 1.52           |
| node 13                  | <b>94.10</b> | 0.48                        | 5.43           |
| node 14                  | 46.67        | 21.93                       | 31.40          |
| node 15                  | <b>90.00</b> | 1.10                        | 8.90           |
| node 16                  | 3.09         | <b>80.08</b>                | 16.83          |
| node 17                  | 0.03         | <b>97.68</b>                | 2.28           |
| node 18                  | 0.00         | <b>99.73</b>                | 0.27           |
| node 19                  | 0.02         | <b>98.62</b>                | 1.35           |
| node 20                  | 0.03         | <b>96.82</b>                | 3.15           |
